# Supplementary material
Source: publisher figshare collection journal article supplement (https://karger.figshare.com/ndownloader/files/27788592)

Figure 6a: Overall mortality based on type of study (multicentre versus single centre)


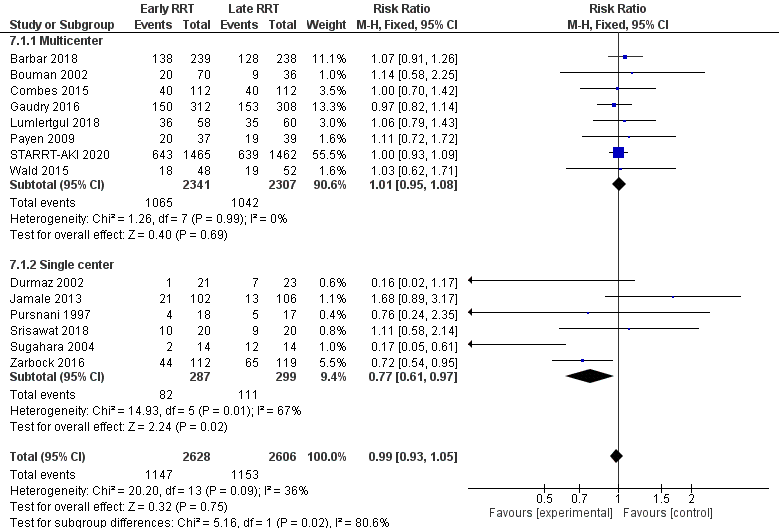


Figure 6 b: Day 60 mortality based on type of study (single center versus multicenter)


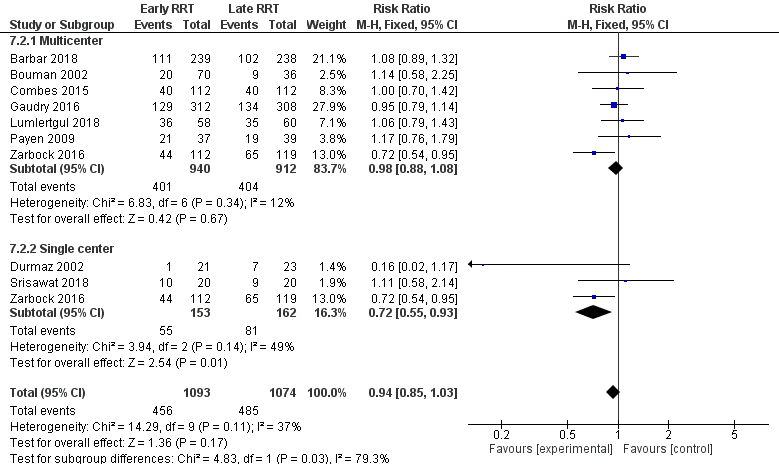

Supplement: Supplementary file 1 [file 27788592]
